# Supplementary material for: High energy-density and reversibility of iron fluoride cathode enabled via an intercalation-extrusion reaction
Source: PubMed Central journal article supplement (PMC5998086; doi:10.1038/s41467-018-04476-2), 2018-06-13
Supplement: 41467_2018_4476_MOESM3_ESM.pdf [file 41467_2018_4476_MOESM3_ESM.pdf]

## **Description of Additional Supplementary Files**

File Name: Supplementary Movie 1

Description: In-situ TEM imaging of  $\text{Fe}_{0.9}\text{Co}_{0.1}\text{OF}$  nanorod for their morphological evolution upon electrochemical lithiation.

File Name: Supplementary Movie 2

Description: In-situ TEM imaging of  $\text{Fe}_{0.9}\text{Co}_{0.1}\text{OF}$  nanorod for their morphological evolution upon electrochemical delithiation.
